# Supplementary material for: COVID-19 Vaccination among Czech Dentists
Source: Vaccines (Basel). 2022 Mar 11;10(3):428. doi: 10.3390/vaccines10030428 (PMC8953980; doi:10.3390/vaccines10030428)
Supplement: Supplementary file 1 [file vaccines-10-00428-s001.zip › vaccines-1591757-supplementary.pdf]

**Table S1.** Questions and their classification.

| Question number | Question                                                      | Question type | Number of Closed-Ended Answer Options | Answer choice |
|-----------------|---------------------------------------------------------------|---------------|---------------------------------------|---------------|
| Q1              | What is your status/approach to vaccination against COVID-19? | Closed        | 3                                     | Single        |
| Q2              | What was the indication for COVID-19 vaccination?             | Semi-closed   | 3                                     | Single        |
| Q3              | Why were you not vaccinated against COVID-19?                 | Semi-closed   | 6                                     | Single        |
| Q4              | Has your COVID-19 vaccination been completed yet?             | Semi-closed   | 4                                     | Single        |
| Q5              | In which month was the COVID-19 vaccination completed?        | Closed        | 9                                     | Single        |
| Q6              | What vaccine was used for the vaccination?                    | Semi-closed   | 5                                     | Single        |
| Q7              | How was vaccination managed?                                  | Semi-closed   | 4                                     | Single        |
| Q8              | Sex                                                           | Closed        | 2                                     | Single        |
| Q9              | Age                                                           | Closed        | 6                                     | Single        |

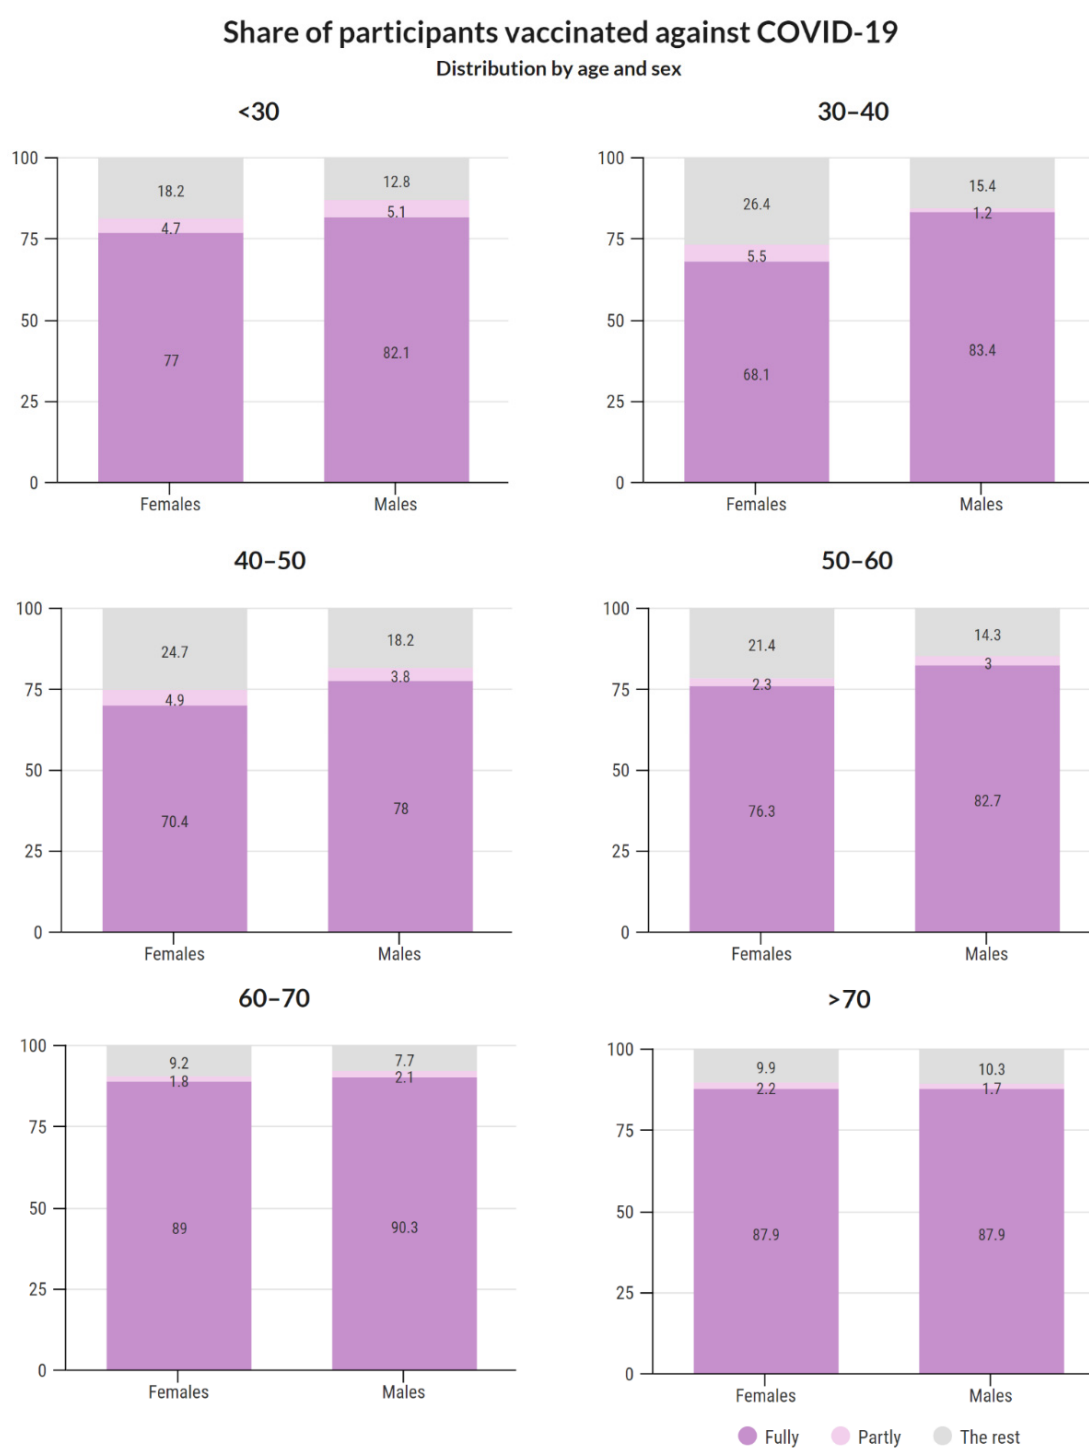

**Figure S1.** Share of participants vaccinated against COVID-19 based on age and sex. Values are given as percentages.

### Month when full vaccination was achieved

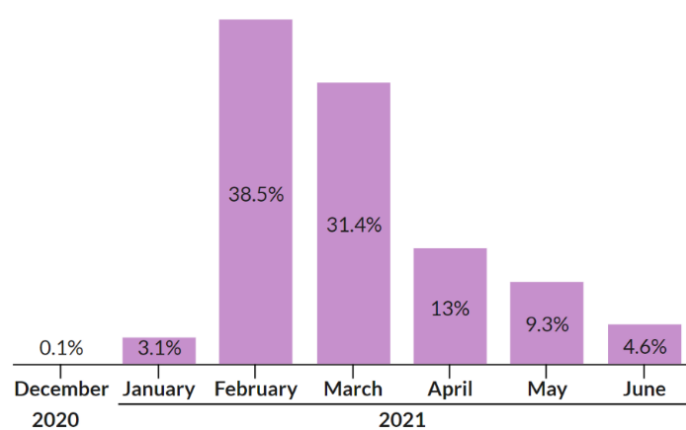

| Month         | No. of responses | %    |
|---------------|------------------|------|
| December 2020 | 2                | 0.1  |
| January 2021  | 66               | 3.1  |
| February 2021 | 832              | 38.5 |
| March 2021    | 679              | 31.4 |
| April 2021    | 280              | 13.0 |
| May 2021      | 201              | 9.3  |
| June 2021     | 100              | 4.6  |

**Figure S2.** The month when full vaccination was achieved.
